# Supplementary material for: Development of a Universal Multi-Epitope Vaccine Candidate against Streptococcus suis Infections Using Immunoinformatics Approaches
Source: MDPI journal article supplement (doi:10.3390/vetsci10060383), 2023-05-31
Supplement: s1 [file s1]

**Table S1. The identification and evaluation of BCL epitopes.**

| Protein | Peptide          | Position | Score | Antigenicity |
|---------|------------------|----------|-------|--------------|
| HP0197  | MKKEEVKTPSVQSNP  | 494-509  | 0.85  | 1.1755       |
|         | EEEYNAHLKQDEGKSI | 153-168  | 0.91  | 1.0451       |
|         | PSVQSNPTLSHKGAPS | 503-518  | 0.87  | 1.0259       |
|         | PAPIPDAPTPKVEEET | 277-292  | 0.93  | 1.0125       |
|         | KAEDSAPKTAVPEVAP | 392-407  | 0.86  | 0.9703       |
|         | APDAAPAPAPTPEVDP | 231-246  | 0.89  | 0.8808       |
| PepO    | PGDNTIEEEYNAHLKQ | 147-162  | 0.88  | 0.8736       |
|         | KENYDGTDEFSLKNQK | 161-176  | 0.89  | 1.288        |
|         | SKLEVAPGYVNGEIS  | 538-553  | 0.85  | 0.8605       |
|         | LKRKDDQGQDGPIVNY | 240-255  | 0.85  | 1.4914       |
|         | IGTGVSGGEKGALEGP | 123-138  | 0.89  | 1.3547       |
|         | MKKEEVKTPSVQSNP  | 969-984  | 0.85  | 1.1755       |
| 6PGD    | EEEYNAHLKQDEGKSI | 628-643  | 0.91  | 1.0451       |
|         | PSVQSNPTLSHKGAPS | 978-993  | 0.87  | 1.0259       |
|         | PAPIPDAPTPKVEEET | 752-767  | 0.93  | 1.0125       |
|         | KAEDSAPKTAVPEVAP | 867-882  | 0.86  | 0.9703       |
|         | AQLRVASKENNWNLPF | 342-357  | 0.85  | 0.9185       |
|         | APDAAPAPAPTPEVDP | 706-721  | 0.89  | 0.8808       |
|         | PGDNTIEEEYNAHLKQ | 622-637  | 0.88  | 0.8736       |

**Table S2. The identification and evaluation of CTL epitopes.**

| Protein | Peptide   | Position | Allele      | Antigenicity | Immunogenicity |
|---------|-----------|----------|-------------|--------------|----------------|
| HP0197  | KERKVEEAL | 420-428  | HLA-B*40:01 | 0.9149       | 0.30758        |
|         | KAGKKVSVY | 452-460  | HLA-A*30:02 | 1.3846       | 0.30454        |
|         | DGKVVATNL | 466-474  | HLA-B*51:01 | 1.4692       | 0.44956        |
| PepO    | LVKGSLEMK | 487-495  | HLA-A*68:01 | 0.9083       | 0.30154        |
|         | ALVPNLPIA | 237-245  | HLA-A*02:01 | 1.5535       | 0.37921        |
|         | KERKVEEAL | 895-903  | HLA-B*40:01 | 0.9149       | 0.30758        |
| 6PGD    | KAGKKVSVY | 927-935  | HLA-A*30:02 | 1.3846       | 0.30454        |
|         | QAGVPVPTF | 417-425  | HLA-A*32:01 | 1.0979       | 0.32054        |
|         | ESRGYSVAI | 23-31    | HLA-B*51:01 | 1.3704       | 0.40123        |

**Table S3. The identification and evaluation of HTL epitopes.**

| Protein | Peptide         | Position | Antigenicity | IL4     | IL10        | IFN $\gamma$ |
|---------|-----------------|----------|--------------|---------|-------------|--------------|
| HP0197  | ANKKFRYSIRKFKVG | 4-18     | 0.8611       | inducer | inducer     | positive     |
|         | NDFKYQIKVENYIRQ | 124-138  | 0.8205       | inducer | inducer     | positive     |
|         | IRKFKVGVGSVLIAT | 12-26    | 0.4895       | inducer | inducer     | positive     |
| PepO    | VQEIKATYAERIKAV | 359-373  | 0.7047       | inducer | non-inducer | negative     |
|         | EVKALVPNLPIAELV | 234-248  | 0.6247       | inducer | inducer     | positive     |
|         | KMRALKKLDLTVVKI | 381-395  | 0.4739       | inducer | non-inducer | negative     |
|         | IVNYIMDAAGNKGTG | 252-266  | 1.0812       | inducer | non-inducer | negative     |
| 6PGD    | GVVGMAVMGRNLALN | 7-21     | 0.6756       | inducer | non-inducer | positive     |
|         | LLDEYFLDVTAKYQQ | 392-406  | 0.6437       | inducer | non-inducer | positive     |
|         | DSYLIEITADILKRK | 229-243  | 0.5099       | inducer | inducer     | positive     |
|         | WRAGCIIRARFLQKI | 364-378  | 0.4151       | inducer | inducer     | positive     |

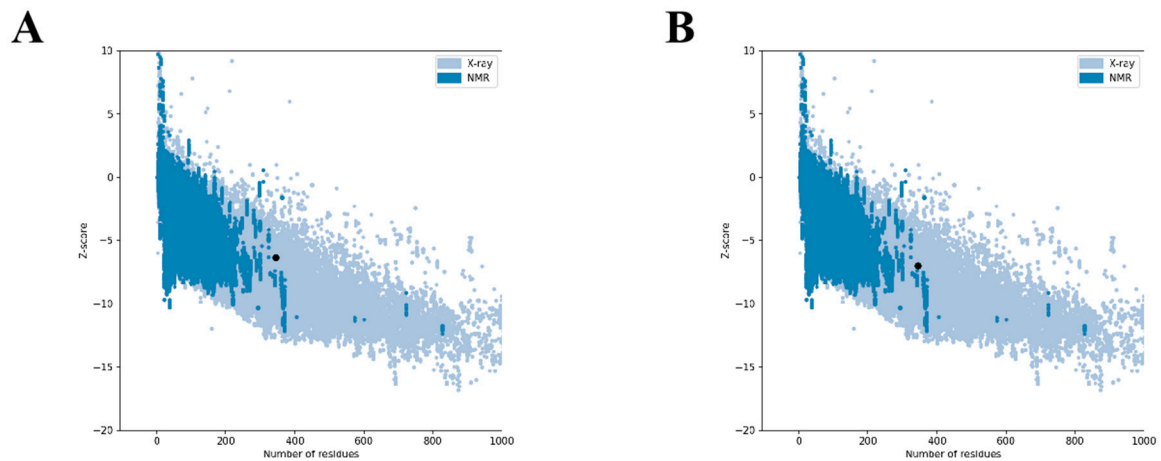

**Figure S1. ProSA-web evaluation of the vaccine structure.** ProSA-web results of the vaccine 3D structure before(A) and after (B) refined by GalaxyRefine. The value of Z-score was -6.36 and -7.01, respectively.

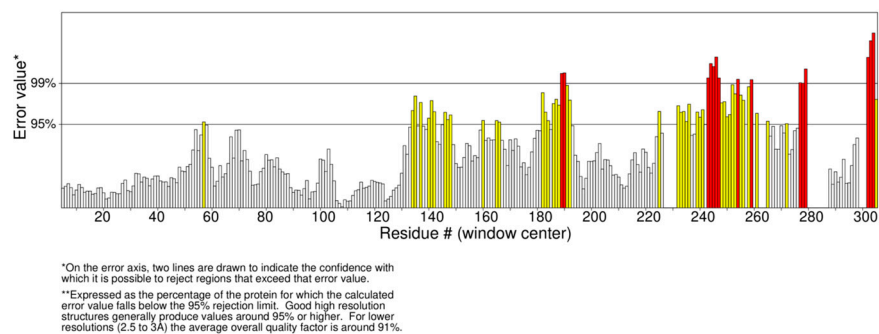

**Figure S2. ERRAT error prediction.** The quality of 3D model MVHP6 is 79.114.

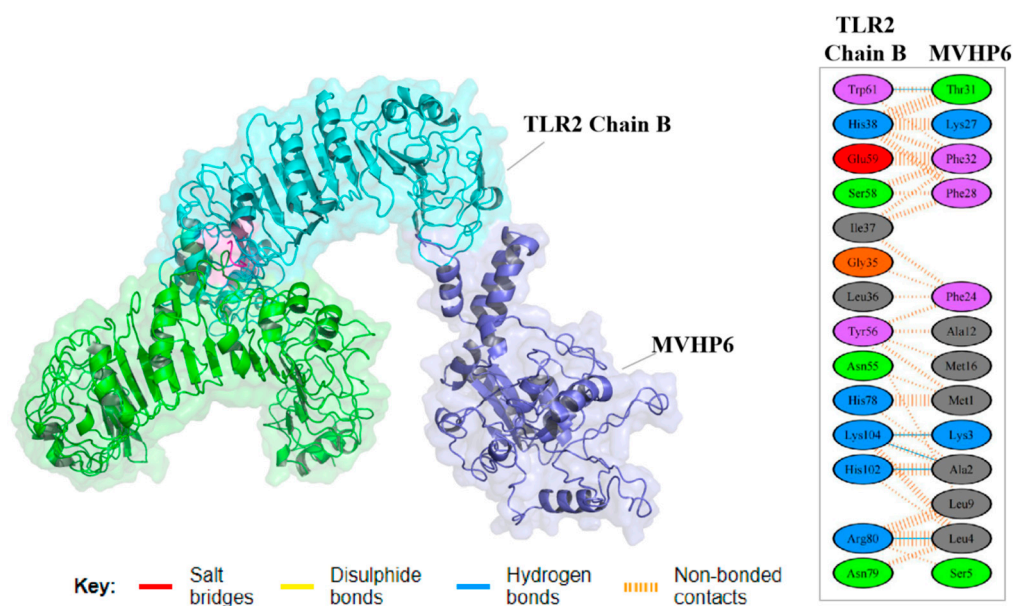

**Figure S3. Residues of the interaction between docked MVHP6 and TLR2.**

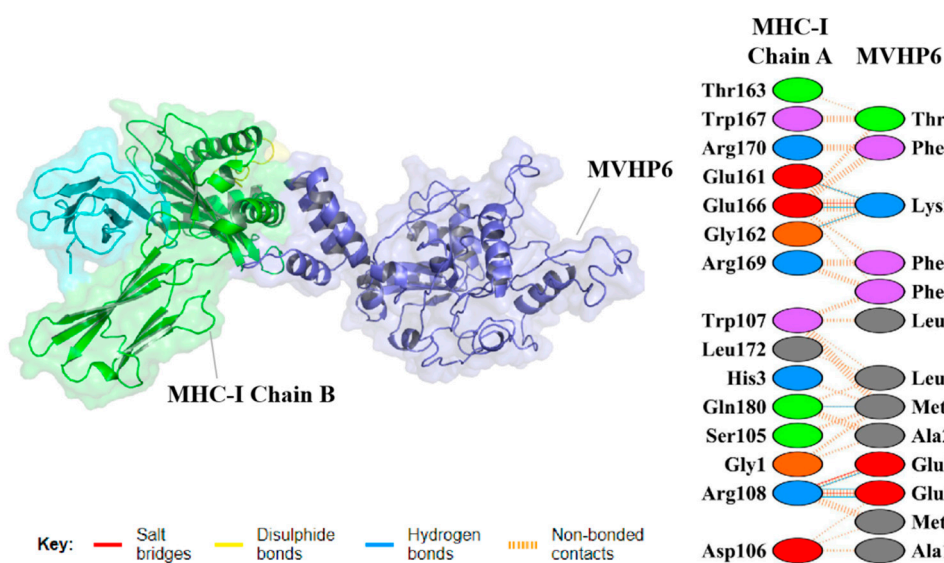

**Figure S4. Residues of the interaction between docked MVHP6 and MHC I.**

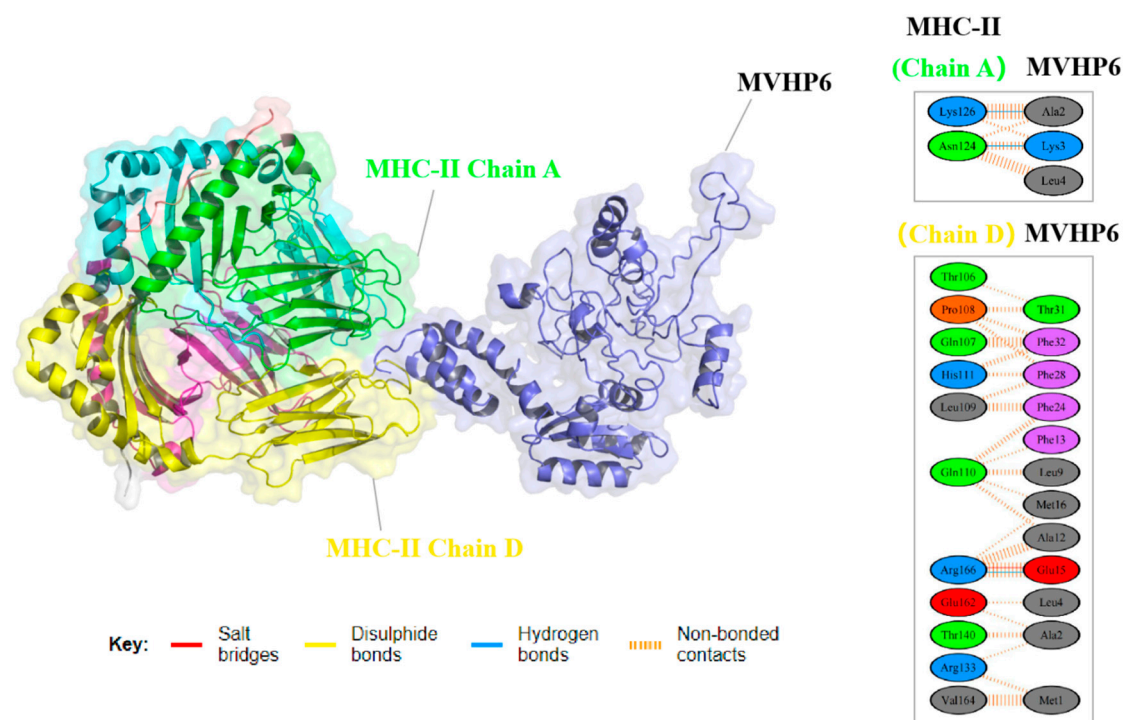

Figure S5. Residues of the interaction between docked MVHP6 and MHC II.
